# Supplementary material for: Vitamin D deficiency and severity of pneumonia in Indonesian children
Source: PubMed Central journal article supplement (PMC8270442; doi:10.1371/journal.pone.0254488), 2021-07-09
Supplement: pone.0254488.s001.pdf [file pone.0254488.s001.pdf]

**CASE REPORT FORM – Clinical data**

**The Burden of Pneumonia In Indonesia Children And The Association With Vitamin D Deficiency: The Indonesian Pneumonia And Vitamin D Study (I-PADS)**

Participant's ID  /  /  / I-PADS

**Instruction:** cross the box or complete with appropriate answer

Patient's name \_\_\_\_\_

Medical record number

Sex 1. Male 2. Female

Date of Birth  /  /  (dd/mm/yyyy)

Admission date  /  /  ; time :  .

Doctor on duty \_\_\_\_\_

1. Admission 1  Polyclinic 2  Emergency Room  
2. Referral case 1  Yes 2  No  
If yes, referred from: 1  Primary Health Care Center 2  Other Hospital  
3  Physician/pediatrician private clinic 4  Midwife private Clinic  
3. Receive antibiotics before admission: 1  Yes 2  No 3  Not Known

**4. Signs (Anamnesis)**

|                |        |       |                 |        |       |
|----------------|--------|-------|-----------------|--------|-------|
| Cough          | 1. Yes | 2. No | Wheezing        | 1. Yes | 2. No |
| Runny nose     | 1. Yes | 2. No | Dyspnea         | 1. Yes | 2. No |
| Fever          | 1. Yes | 2. No | Noisy breathing | 1. Yes | 2. No |
| Fast breathing | 1. Yes | 2. No | Others, _____   | 1. Yes | 2. No |

**5. Danger sign**

|                             |                                |                               |
|-----------------------------|--------------------------------|-------------------------------|
| Unable to drink/feed        | 1 <input type="checkbox"/> Yes | 2 <input type="checkbox"/> No |
| Stridor                     | 1 <input type="checkbox"/> Yes | 2 <input type="checkbox"/> No |
| Lethargic/ unconscious      | 1 <input type="checkbox"/> Yes | 2 <input type="checkbox"/> No |
| Cyanosis                    | 1 <input type="checkbox"/> Yes | 2 <input type="checkbox"/> No |
| Severe Respiratory distress | 1 <input type="checkbox"/> Yes | 2 <input type="checkbox"/> No |
| Seizure                     | 1 <input type="checkbox"/> Yes | 2 <input type="checkbox"/> No |

**6. Physical examination (at admission or during first 24 hours medical care)**

Respiratory rate:  / minute Heart rate:  / minute axilla temp.:

Body weight: ,  kgs Body weight/Length: ,  cms

Chest indrawing (subcostal) 1  Yes 2  No

Wheezing 1  Ada 2  No

*Pulse oximetry* 1  Performed 2  Not Performed

If performed, Result SaO<sub>2</sub>:  % (without receiving oxygen)

7. Initial diagnosis:

Primary diagnosis

1  Pneumonia

2  Asthma attack

3  Bronchiolitis

4  Others, mention:.....

Secondary diagnosis

1  Acute diarrhea

2  Sepsis

4  Underweight

4  Others: .....

8. B20:

1  Yes

2  No

3  Not examined

Participant's ID   /     /    / I-PADS

**COMPLETED BY RESEARCH ASSISTANT**

Participant's name: \_\_\_\_\_

9. Vitamin D level (completed by research assistant):    nmol

10. Blood examination

|             |                                                                                                                               |                           |            |                                                                                       |                           |
|-------------|-------------------------------------------------------------------------------------------------------------------------------|---------------------------|------------|---------------------------------------------------------------------------------------|---------------------------|
| Hemoglobin  | <input type="text"/> <input type="text"/> , <input type="text"/> <input type="text"/>                                         | g/dL                      | Leucocyte  | <input type="text"/> <input type="text"/> , <input type="text"/> <input type="text"/> | 10 <sup>3</sup> / $\mu$ L |
| Hematocrit  | <input type="text"/> <input type="text"/> , <input type="text"/> <input type="text"/>                                         | %                         | Lymphocyte | <input type="text"/> <input type="text"/> , <input type="text"/> <input type="text"/> | %                         |
| Erythrocyte | <input type="text"/> <input type="text"/> , <input type="text"/> <input type="text"/>                                         | 10 <sup>6</sup> / $\mu$ L | Neutrophil | <input type="text"/> <input type="text"/> , <input type="text"/> <input type="text"/> | %                         |
| MCV         | <input type="text"/> <input type="text"/> , <input type="text"/> <input type="text"/>                                         | fL                        | Eosinophil | <input type="text"/> <input type="text"/> , <input type="text"/> <input type="text"/> | %                         |
| MCH         | <input type="text"/> <input type="text"/> , <input type="text"/> <input type="text"/>                                         | pg                        | Basophil   | <input type="text"/> <input type="text"/> , <input type="text"/> <input type="text"/> | %                         |
| MCHC        | <input type="text"/> <input type="text"/> , <input type="text"/> <input type="text"/>                                         | g/dL                      | Monocyte   | <input type="text"/> <input type="text"/> , <input type="text"/> <input type="text"/> | %                         |
| Thrombocyte | <input type="text"/> <input type="text"/> <input type="text"/> <input type="text"/> <input type="text"/> <input type="text"/> | / $\mu$ L                 |            |                                                                                       |                           |

11. Radiology examination (Thorax)                      1  Performed                      2  Not performed  
 Radiology result's conclusion from site (hospital):

|               | Yes                      | No                       |
|---------------|--------------------------|--------------------------|
| Normal        | <input type="checkbox"/> | <input type="checkbox"/> |
| Infiltrat     | <input type="checkbox"/> | <input type="checkbox"/> |
| Consolidation | <input type="checkbox"/> | <input type="checkbox"/> |
| Milier        | <input type="checkbox"/> | <input type="checkbox"/> |

|                       | Yes                      | No                       |
|-----------------------|--------------------------|--------------------------|
| Atelectasis           | <input type="checkbox"/> | <input type="checkbox"/> |
| Hilar limphadenopathy | <input type="checkbox"/> | <input type="checkbox"/> |
| Effusion              | <input type="checkbox"/> | <input type="checkbox"/> |
| Others:               | <input type="checkbox"/> | <input type="checkbox"/> |

Conclusion: \_\_\_\_\_

12. Initial antibiotics therapy given at admission in the hospital:

|                 | Yes                      | No                       |
|-----------------|--------------------------|--------------------------|
| Cotrimoxazole   | <input type="checkbox"/> | <input type="checkbox"/> |
| Amoxicillin     | <input type="checkbox"/> | <input type="checkbox"/> |
| Erythromycin    | <input type="checkbox"/> | <input type="checkbox"/> |
| Ampicillin      | <input type="checkbox"/> | <input type="checkbox"/> |
| Gentamycin      | <input type="checkbox"/> | <input type="checkbox"/> |
| Chloramphenicol | <input type="checkbox"/> | <input type="checkbox"/> |

|                        | Yes                      | No                       |
|------------------------|--------------------------|--------------------------|
| Cefotaxim              | <input type="checkbox"/> | <input type="checkbox"/> |
| Ceftriaxon             | <input type="checkbox"/> | <input type="checkbox"/> |
| Amoxicillin Clavulanat | <input type="checkbox"/> | <input type="checkbox"/> |
| Penicillin             | <input type="checkbox"/> | <input type="checkbox"/> |
| Others, mention:       | <input type="checkbox"/> | <input type="checkbox"/> |

13. B2 agonis via nebulizer                      1  Yes                      2  No

14. Steroid                      1  Yes                      2  No

15. Oral Salbutamol                      1  Yes                      2  No

16. Oxygenation                      1  Yes                      2  No

Start date                        /   /     (dd/mm/yyyy)

End date                        /   /     (dd/mm/yyyy)

17. ICU entry                      1  Yes                      2  No

If yes,  
 Entry date                        /   /     (dd/mm/yyyy)

Exit date                        /   /     (dd/mm/yyyy)

18. Hospital discharge date                        /   /     (dd/mm/yyyy)

19. Final Diagnosis

Primary diagnosis

1  Pneumonia

2  Asthma attack

3  Bronchiolitis

4  Others, mention : .....

Secondary diagnosis

1  Acute diarrhea

2  Sepsis

3  Underweight

4  Other: .....

20. Discharge status: 1  Alive

2  Death

3  Discharge against medical advice

## QUESTIONER – HOSPITAL BASED I-PADS

### The Burden of Pneumonia In Indonesia Children And The Association With Vitamin D Deficiency: The Indonesian Pneumonia And Vitamin D Study (I-PADS)

Circle or complete answers that apply

#### PATIENT'S INFORMATION

1. Study ID   /     /  -    / I-PADS
2. Patient's name \_\_\_\_\_
3. Medical record number
4. Gender 1. Male 2. Female
5. Address \_\_\_\_\_
6. Phone number
7. Referral 1. Home 2. General practitioner/Paediatrician  
3. Other hospital/Primary Health Care
8. Nutritional status Weight     grams  
Weight/Length  ,
9. Vaccination status, please check if up to date

|                          |       |                         |                          |                                     |                              |
|--------------------------|-------|-------------------------|--------------------------|-------------------------------------|------------------------------|
| <input type="checkbox"/> | Age 0 | Hep B 0                 | <input type="checkbox"/> | Age 4                               | DTP-Hep B-Hib 3/Polio 3      |
| <input type="checkbox"/> | Age 1 | BCG                     | <input type="checkbox"/> | Age 9                               | Measles                      |
| <input type="checkbox"/> | Age 2 | DTP-Hep B-Hib 1/Polio 1 | <input type="checkbox"/> | Age 18                              | DTP-Hep B-Hib, polio Booster |
| <input type="checkbox"/> | Age 3 | DTP-Hep B-Hib 2/Polio 2 | <input type="checkbox"/> | Pneumococcal vaccine (i.e Prevenar) |                              |

#### PARENTS' INFORMATION

10. Parents' age Mother \_\_\_\_\_ years
11. Parents' education (Please fill out based on the code)
 

|                                |                |
|--------------------------------|----------------|
| code: 1: Middle school or less | 2: High school |
| 3: University                  | 4: Other       |

 Mother  Father
12. Family income (please circle the correct answer)
 

|                             |                              |
|-----------------------------|------------------------------|
| 1. <Rp 500.000,00           | 4. Rp 2.500.000-Rp 5.000.000 |
| 2. Rp 500.000-Rp1.000.000   | 5. >Rp 5.000.000             |
| 3. Rp 1.000.000-Rp2.500.000 |                              |

#### RISK FACTORS

### At birth and early years

(Please circle the correct answer or complete the boxes)

13. Gestational age  weeks +  days
14. Birth weight  grams
15. Congenital Heart Disease 1. Yes 2. No If yes, mention \_\_\_\_\_
16. Congenital syndrome 1. Yes 2. No If yes, mention \_\_\_\_\_

### Crowdedness

(Please circle the correct answer or complete the boxes)

17. Number of people at home (excluding the child)  people
18. Child care attendance 1. Yes 2. No

### Early Months Feeding

(Please circle the correct answer or complete the boxes)

19. Exclusive breastfeeding 1. Yes 2. No
20. Age started solid food  Months +  weeks
21. Age when formula started  Months +  weeks
22. Who is the primary care giver of the baby?? (please circle the answer)
1. Mother 2. Father 3. Other family member 4. Babysitter
5. Others, mention \_\_\_\_\_

### Air Pollution

23. Do any family members currently smoke (in the last 12 months)? (Please put the number that applies)

- 22.1 Mother  1. Not at all 4. Yes, at least monthly
- 22.2 Father  2. Yes, daily
- 22.3 Other family member  3. Yes, at least weekly  
(living in the same roof with child)

24. If yes, on average how many cigarettes do you smoke? (Please put the number that applies)

- 23.1 Mother  1. <12units
- 23.2 Father  2. 12-24 units
- 23.3 Other family member  3. >24 units  
(living in the same roof with child)

25. The main material for cooking (please circle the correct answer)

1. Electric 3. Kerosene 5. Charcoal
2. Gas 4. Wood 6. Other

### Sun exposure

26. Do you usually take your child outside the house? (Please circle and complete answer that applies)

- 25.1 **On a weekday** 1. Yes, \_\_\_\_\_ times/week 2. No
- 25.2 **On a weekend** 1. Yes, \_\_\_\_\_ times/week 2. No

27 At what time of the day do you usually take your child outside the house (Please tick the correct answer)

| No   | Hour                      | On Weekdays | On Weekend |
|------|---------------------------|-------------|------------|
| 27.1 | Before 10.00am            |             |            |
| 27.2 | Between 10.00am – 16.00pm |             |            |
| 27.3 | After 16.00 pm            |             |            |

28 On average, how many hour do you take your child outside in a day (Please put the number that applies)

28.1 On a weekday

28.2 On a weekend

1. Less than 15 min

4. 1 to 2 hours

6. 4 to 5 hours

2. 15 min to 30 min

5. 2 to 3 hours

7. 5 to 6 hours

3. 31 min to 1 hour

29 What does your child usually wear to go outside during a warm sunny day? (Please tick the correct answer)

29.1 Arms exposed

| No | Arms               | On Weekdays | On Weekend |
|----|--------------------|-------------|------------|
| 1  | Not exposed at all |             |            |
| 2  | < 50% time exposed |             |            |
| 3  | ≥ 50% time exposed |             |            |
| 4  | Always exposed     |             |            |

29.2 Lower extremity exposed (thigh to heel))

| No | Lower Extremity    | On Weekdays | On Weekend |
|----|--------------------|-------------|------------|
| 1  | Not exposed at all |             |            |
| 2  | < 50% time exposed |             |            |
| 3  | ≥ 50% time exposed |             |            |
| 4  | Always exposed     |             |            |

29.3 Sun Screen Usage

| No | Usage             | On Weekdays | On Weekend |
|----|-------------------|-------------|------------|
| 1  | Always            |             |            |
| 2  | < 50% of the time |             |            |
| 3  | ≥ 50% of the time |             |            |
| 4  | Not at all        |             |            |

29.4 Sunglasses Usage

| No | Usage             | On Weekdays | On Weekend |
|----|-------------------|-------------|------------|
| 1  | Always            |             |            |
| 2  | < 50% of the time |             |            |
| 3  | ≥ 50% of the time |             |            |
| 4  | Not at all        |             |            |

29.5 Umbrella Usage

| <b>No</b> | <b>Usage</b>      | <b>On Weekdays</b> | <b>On Weekend</b> |
|-----------|-------------------|--------------------|-------------------|
| 1         | Always            |                    |                   |
| 2         | < 50% of the time |                    |                   |
| 3         | ≥ 50% of the time |                    |                   |
| 4         | Not at all        |                    |                   |







Jumlah leukosit  /  $\mu$ L  
Limfosit  %

**Dilengkapi selama rawat inap:**

22.2 Pemeriksaan CRP (jika dilakukan)

Kualitatif 1. Positif 2. Negatif

Kuantitatif  mg/L

22.3 Kultur darah (jika dilakukan)

Tanggal  /  /

Waktu pelaksanaan 1. Sebelum pemberian antibiotik  
2. Setelah pemberian antibiotik

Hasil kultur darah:

Negatif 1. Tidak 2. Ya

Streptococcus pneumonia 1. Tidak 2. Ya

Staphylococcus 1. Tidak 2. Ya

Pseudomonas 1. Tidak 2. Ya

Klebsiela pneumoniae 1. Tidak 2. Ya

Haemophylus influenza 1. Tidak 2. Ya

Lain-lain, sebutkan \_\_\_\_\_

23. Pemeriksaan Radiologi  Ya  Tidak

Kesimpulan hasil pemeriksaan pihak RS (site):

24. Copy foto rontgen thorax terambil  Ya  Tidak

**(Perhatian: Jangan lupa mengambil foto dari foto rontgen thorax)**

25. Terapi antibiotik
- |                  |                         |
|------------------|-------------------------|
| 1. Cotrimoxazole | 6. Amoxicillin          |
| 2. Erythromycin  | 7. Gentamycin           |
| 3. Cefotaxim     | 8. Amoxicillin clauvant |
| 4. Penicillin    | 9. Ceftriaxone          |
| 5. Ampicillin    | 10. Other, _____        |

26. Apakah dilakukan penggantian antibiotic saat rawat inap?

1. Ya                      2. Tidak

26.1 Jika ya, Antibiotik diganti menjadi:

- |                  |                         |
|------------------|-------------------------|
| 1. Cotrimoxazole | 6. Amoxicillin          |
| 2. Erythromycin  | 7. Gentamycin           |
| 3. Cefotaxim     | 8. Amoxicillin clauvant |
| 4. Penicillin    | 9. Ceftriaxone          |
| 5. Ampicillin    | 10. Other, _____        |

\_\_\_\_\_ (dapat menyebutkan lebih dari 1)

26.2 Perubahan disarankan pada hari ke \_\_\_\_\_

27. Oksigenasi                      1. Ya                      2. Tidak

27.1 Tanggal mulai      /   /     (dd/mm/yyyy)

27.2 Tanggal berakhir   /   /     (dd/mm/yyyy)

27.3 Metode                                      1. Nasal canule                      2. Rebreathing mask  
(lingkari sesuai jawaban)                      3. Non-rebreathing mask                      4. Head box

28. Masuk ICU                      1. Ya                      2. Tidak

28.1 Tanggal mulai      /   /     (dd/mm/yyyy)

28.2 Tanggal berakhir   /   /     (dd/mm/yyyy)

**KELUAR RUMAH SAKIT (RS) – Diisi oleh tim penelitian**

**Petunjuk: Lingkarilah jawaban yang sesuai**

29. Tanggal keluar RS      /   /     (dd/mm/yyyy)

30. Diagnosis akhir

|              |                  |
|--------------|------------------|
| 1. Pneumonia | 2. Bronchiolitis |
| 3. Asthma    | 4. Other, _____  |

31. Status

1. Sembuh
2. Atas Permintaan Pasien
3. Meninggal dunia

## KUESIONER – I-PADS BERBASIS RUMAH SAKIT

### Beban Penyakit Pneumonia pada Anak-anak di Indonesia dan Hubungan dengan Defisiensi Vitamin D: Penelitian Indonesian Pneumonia and Vitamin D (I-PAD)

Lingkarilah atau lengkapi dengan jawaban yang sesuai

#### INFORMASI PASIEN

1. ID peserta   /     /  -    / I-PADS
2. Nama peserta \_\_\_\_\_
3. Nomor Rekam Medis
4. Jenis Kelamin 1. Laki-laki      2. Perempuan
5. Alamat \_\_\_\_\_
6. Nomor telepon
7. Asal rujukan 1. Rumah      2. Dokter umum/ dokter anak  
3. Rumah sakit/ puskesmas lainnya
8. Status nutrisi Berat badan     kg  
Panjang/tinggi badan    cm
9. Status imunisasi, tolong beri tanda centang apabila sudah menerima (usia dalam bulan)

|                          |        |                         |                          |                                     |                              |
|--------------------------|--------|-------------------------|--------------------------|-------------------------------------|------------------------------|
| <input type="checkbox"/> | Usia 0 | Hep B 0                 | <input type="checkbox"/> | Usia 4                              | DTP-Hep B-Hib 3/Polio 3      |
| <input type="checkbox"/> | Usia 1 | BCG                     | <input type="checkbox"/> | Usia 9                              | Campak                       |
| <input type="checkbox"/> | Usia 2 | DTP-Hep B-Hib 1/Polio 1 | <input type="checkbox"/> | Usia 18                             | DTP-Hep B-Hib, polio Booster |
| <input type="checkbox"/> | Usia 3 | DTP-Hep B-Hib 2/Polio 2 | <input type="checkbox"/> | Vaksin Pneumococcal (i.e. Prevenar) |                              |

#### INFORMASI ORANGTUA

10. Tanggal lahir Ibu   /   /     (dd/mm/yyyy)  
Usia ibu   tahun
11. Pendidikan orang tua (isikan berdasarkan kode yang tersedia)  
kode: 1: SMP atau dibawahnya      2: SMA/ sederajat  
3: Universitas/ sederajat      4: Lainnya  
Ibu       Bapak

12. Pemasukan keluarga (Lingkarilah jawaban yang sesuai)
- |                             |                              |
|-----------------------------|------------------------------|
| 1. <Rp 500.000,00           | 4. Rp 2.500.000-Rp 5.000.000 |
| 2. Rp 500.000-Rp1.000.000   | 5. >Rp 5.000.000             |
| 3. Rp 1.000.000-Rp2.500.000 |                              |

### FAKTOR RISIKO

#### Saat kelahiran dan awal kelahiran

(lingkarilah jawaban yang sesuai atau lengkapi kotak yang tersedia)

13. Usia kehamilan  minggu+  hari
14. Berat bayi lahir  gram
15. Kelainan Jantung Bawaan 1. Ya 2.Tidak Jika ya, sebutkan\_\_\_\_\_
16. Sindrom bawaan 1. Ya 2.Tidak Jika ya, sebutkan\_\_\_\_\_

#### Kepadatan

(lingkarilah jawaban yang sesuai atau lengkapi kotak yang tersedia)

17. Jumlah orang yang tinggal serumah dengan anak (tidak termasuk anak) orang
18. Apakah anak Anda juga diasuh di Tempat Penitipan Anak (TPA)? (silakan lingkari jawaban yang sesuai)
1. Ya 2.Tidak

#### Kebiasaan makan pada awal kehidupan

(lingkarilah jawaban yang sesuai atau lengkapi kotak yang tersedia)

19. ASI eksklusif 6 bulan 1. Ya 2.Tidak
20. Usia mulai makanan padat  bulan +  minggu
21. Usia mulai susu formula  bulan +  minggu
22. Siapakah yang menjadi pengasuh utama anak? (silakan lingkari jawaban yang sesuai)
1. Ibu 2. Ayah 3. Keluarga lainnya 4. Pengasuh anak/babysitter
5. Lainnya, sebutkan\_\_\_\_\_

#### Polusi udara

23. Adakah anggota keluarga yang merokok (dalam kurun waktu 12 bulan terakhir)?  
(tuliskan nomor yang sesuai pada kotak yang tersedia dan (-) jika tidak)

- 23.1 Ibu  1. Tidak sama sekali 4. Ya, minimal per bulan
- 23.2 Bapak  2. Ya, setiap hari
- 23.3 Anggota keluarga lain  3. Ya, minimal per minggu  
(yang tinggal satu rumah dengan anak)

24. Jikaya, rata-rata berapa banyak batang rokok yang dikonsumsi? (tuliskan nomor yang sesuai pada kotak yang tersedia dan (-) jika tidak)

- 24.1 Ibu  1. ≤12batang
- 24.2 Bapak  2. 13-24 batang
- 24.3 Anggota keluarga lain  3. >24 batang  
(yang tinggal satu rumah dengan anak)

25. Apakah bahan bakar utama yang digunakan dirumah untuk memasak? (lingkarilah jawaban yang sesuai)

1. Listrik                      3. Minyak tanah                      5. Arang  
 2. Gas                              4. Kayu                                      6. Lainnya

**Paparan sinar matahari**

26. Apakah Anda biasa membawa anak Anda keluar rumah? (lingkarilah dan lengkapilah jawaban yang sesuai)

- 26.1 **Pada hari kerja**    1. Ya, \_\_\_\_\_kali/minggu                      2. Tidak  
 26.2 **Pada akhir pekan** 1. Ya, \_\_\_\_\_ kali/minggu                      2. Tidak

27. Kapan Anda biasanya membawa anak keluar rumah? (berikan tanda centang pada jawaban yang sesuai)

| No   | Jam                      | Pada hari Kerja | Pada akhir pekan |
|------|--------------------------|-----------------|------------------|
| 27.1 | Sebelum jam 10.00        |                 |                  |
| 27.2 | Antara jam 10.00 – 16.00 |                 |                  |
| 27.3 | Setelah jam 16.00        |                 |                  |

28. Rata-rata, berapa lama Anda membawa anak Anda keluar ruangan? (Isikan nomor yang sesuai dengan jawaban Anda)

- 28.1 **Pada hari kerja**                        
 28.2 **Pada akhir pekan**

1. Kurang dari 15 menit                      4. 2 jam                                      6. 4 jam  
 2. 15 menit - 30 menit                      5. 3 jam                                      7. 5 jam  
 3. 31 menit - 1 jam

29. Bagaimanakah kebiasaan berpakaian anak selama terpapar sinar matahari (beri tanda centang pada jawaban yang sesuai)

29.1 Terekspos bagian lengan

| No | Bagian Lengan              | Pada hari Kerja | Pada akhir pekan |
|----|----------------------------|-----------------|------------------|
| 1  | Tidak terpapar sama sekali |                 |                  |
| 2  | < 50% waktu terpapar       |                 |                  |
| 3  | ≥ 50% waktu terpapar       |                 |                  |
| 4  | Selalu terpapar            |                 |                  |

29.2 Terekspos bagian esktremitas bawah (paha hingga tumit)

| No | Bagian esktremitas bawah   | Pada hari Kerja | Pada akhir pekan |
|----|----------------------------|-----------------|------------------|
| 1  | Tidak terpapar sama sekali |                 |                  |
| 2  | < 50% waktu terpapar       |                 |                  |
| 3  | ≥ 50% waktu terpapar       |                 |                  |
| 4  | Selalu terpapar            |                 |                  |

29.3 Menggunakan tabir surya

| No | Penggunaan                            | Pada hari Kerja | Pada akhir pekan |
|----|---------------------------------------|-----------------|------------------|
| 1  | Selalu menggunakan                    |                 |                  |
| 2  | Menggunakan < 50% waktu terpapar      |                 |                  |
| 3  | Menggunakan $\geq$ 50% waktu terpapar |                 |                  |
| 4  | Tidak menggunakan sama sekali         |                 |                  |

29.4 Menggunakan kacamata

| No | Penggunaan                            | Pada hari Kerja | Pada akhir pekan |
|----|---------------------------------------|-----------------|------------------|
| 1  | Selalu menggunakan                    |                 |                  |
| 2  | Menggunakan < 50% waktu terpapar      |                 |                  |
| 3  | Menggunakan $\geq$ 50% waktu terpapar |                 |                  |
| 4  | Tidak menggunakan sama sekali         |                 |                  |

29.5 Menggunakan payung

| No | Penggunaan                            | Pada hari Kerja | Pada akhir pekan |
|----|---------------------------------------|-----------------|------------------|
| 1  | Selalu menggunakan                    |                 |                  |
| 2  | Menggunakan < 50% waktu terpapar      |                 |                  |
| 3  | Menggunakan $\geq$ 50% waktu terpapar |                 |                  |
| 4  | Tidak menggunakan sama sekali         |                 |                  |
